# Supplementary material
Source: MDPI journal article supplement (https://www.mdpi.com/2411-5142/8/1/18)
Supplement: s1 [file s1]

## SUPPLEMENTARY MATERIAL

**Table S1.** Absolute and relative frequencies of women as first and last author overall and by year of publication, stratified by continent of origin of the first author

|                                   | Total            | 2017 <sup>°</sup> | 2018             | 2019             | 2020             | 2021             | 2022 <sup>¥</sup> | Change from 2017 to 2021 | Change from 2017 to 2022 |        |
|-----------------------------------|------------------|-------------------|------------------|------------------|------------------|------------------|-------------------|--------------------------|--------------------------|--------|
| <b>N of women as first author</b> | <b>% (n/tot)</b> | <b>% (n/tot)</b>  | <b>% (n/tot)</b> | <b>% (n/tot)</b> | <b>% (n/tot)</b> | <b>% (n/tot)</b> | <b>% (n/tot)</b>  |                          |                          | 0.066  |
| Africa                            | 33.0 (31/94)     | 40.0 (4/10)       | 27.3 (3/11)      | 42.9 (9/21)      | 33.3 (8/24)      | 21.7 (5/23)      | 40.0 (2/5)        | -18.3                    | 0.0                      |        |
| Asia                              | 43.3 (462/1066)  | 47.3 (53/112)     | 39.5 (70/177)    | 43.6 (102/234)   | 47.2 (116/246)   | 40.8 (98/240)    | 40.4 (23/57)      | -6.5                     | -6.9                     |        |
| Europe                            | 47.2 (947/2007)  | 51.1 (139/272)    | 47.3 (200/423)   | 47.4 (219/462)   | 45.8 (204/445)   | 41.4 (155/374)   | 44.8 (30/67)      | -9.7                     | -6.3                     |        |
| North-Central America             | 48.3 (525/1087)  | 47.9 (69/144)     | 40.7 (109/268)   | 53.7 (131/244)   | 48.0 (96/200)    | 52.2 (108/207)   | 50.0 (12/24)      | 4.3                      | 2.1                      |        |
| Oceania                           | 53.1 (197/371)   | 47.1 (33/70)      | 59.0 (49/83)     | 50.7 (37/73)     | 47.7 (31/65)     | 58.1 (36/62)     | 61.1 (11/18)      | 11.0                     | 14.0                     |        |
| South America                     | 45.3 (287/634)   | 45.2 (28/62)      | 45.4 (64/141)    | 44.1 (56/127)    | 44.6 (66/148)    | 48.4 (61/126)    | 40.0 (12/30)      | 3.2                      | -5.2                     |        |
| <b>N of women as last author</b>  | <b>% (n/tot)</b> | <b>% (n/tot)</b>  | <b>% (n/tot)</b> | <b>% (n/tot)</b> | <b>% (n/tot)</b> | <b>% (n/tot)</b> | <b>% (n/tot)</b>  |                          |                          | 0.1104 |
| Africa                            | 27.7 (26/94)     | 40.0 (4/10)       | 9.0 (1/11)       | 23.8 (5/21)      | 29.2 (7/24)      | 30.4 (7/23)      | 40.0 (2/5)        | -9.6                     | 0.0                      |        |
| Asia                              | 30.4 (324/1066)  | 31.2 (35/112)     | 31.6 (56/177)    | 31.6 (74/234)    | 31.7 (78/246)    | 27.5 (66/240)    | 26.3 (15/57)      | -3.7                     | 4.9                      |        |
| Europe                            | 33.3 (669/2007)  | 32.0 (87/272)     | 29.6 (125/423)   | 29.3 (145/426)   | 37.5 (167/445)   | 33.7 (126/374)   | 28.3 (19/67)      | 1.7                      | -3.7                     |        |
| North-Central America             | 37.2 (404/1087)  | 34.0 (49/144)     | 38.1 (102/268)   | 37.3 (91/244)    | 41 (82/200)      | 33.8 (70/207)    | 41.7 (10/24)      | -0.2                     | 7.7                      |        |
| Oceania                           | 38.8 (144/371)   | 37.1 (26/70)      | 39.8 (33/83)     | 37.0 (27/73)     | 32.3 (21/65)     | 46.8 (29/62)     | 44.4 (8/18)       | 9.7                      | 7.3                      |        |
| South America                     | 30.0 (190/634)   | 40.3 (25/62)      | 25.5 (36/141)    | 28.3 (36/127)    | 33.8 (50/148)    | 24.8 (35/126)    | 26.7 (8/30)       | -15.5                    | -13.6                    |        |

<sup>°</sup> April; <sup>¥</sup> March

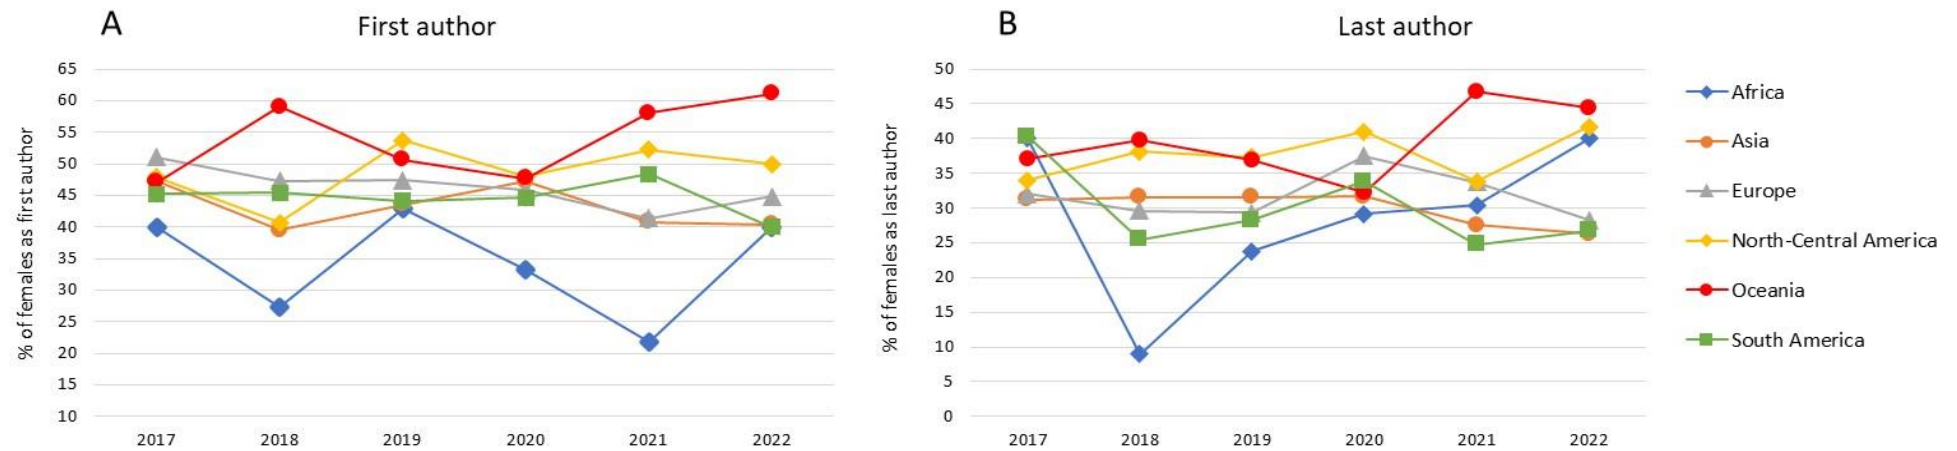

**Figure S1** Percentage of women as first (A) and last (B) for each continent and divided by the year of the publication

**Table S2** Distribution of articles published by women as either first or last authors divided by journal ranking (quartiles) per years of publication

| Journal ranking (percentile) | Total       | 2017 <sup>°</sup> | 2018       | 2019       | 2020       | 2021       | 2022 <sup>¥</sup> | Change from 2017 to 2021 | Change from 2017 to 2022 | P value <sup>a</sup> |
|------------------------------|-------------|-------------------|------------|------------|------------|------------|-------------------|--------------------------|--------------------------|----------------------|
| <25                          | 1329 (42.9) | 162 (40.8)        | 283 (43.9) | 291 (42.5) | 283 (41.9) | 264 (44.9) | 46 (41.1)         | 4.1                      | 0.3                      | 0.023                |
| 25-49                        | 890 (28.7)  | 148 (37.3)        | 180 (27.9) | 183 (26.8) | 181 (26.8) | 165 (28.1) | 22 (29.5)         | -9.2                     | -7.8                     |                      |
| 50-74                        | 539 (17.4)  | 53 (13.4)         | 115 (17.8) | 135 (19.7) | 131 (19.4) | 86 (14.6)  | 19 (17.0)         | 1.2                      | 3.6                      |                      |
| ≥75                          | 343 (11.1)  | 34 (8.6)          | 67 (10.4)  | 75 (11.0)  | 80 (11.9)  | 73 (12.4)  | 14 (12.5)         | 3.8                      | 3.9                      |                      |

<sup>°</sup>April

<sup>¥</sup>March

<sup>a</sup>comparison between males and females distribution per years performed through  $\chi^2$  test for trend
